# Supplementary material for: Anti-SARS-CoV-2 Agents in Artemisia Endophytic Fungi and Their Abundance in Artemisia vulgaris Tissue
Source: MDPI journal article supplement (doi:10.3390/jof9090905), 2023-09-05
Supplement: s1 [file s1]

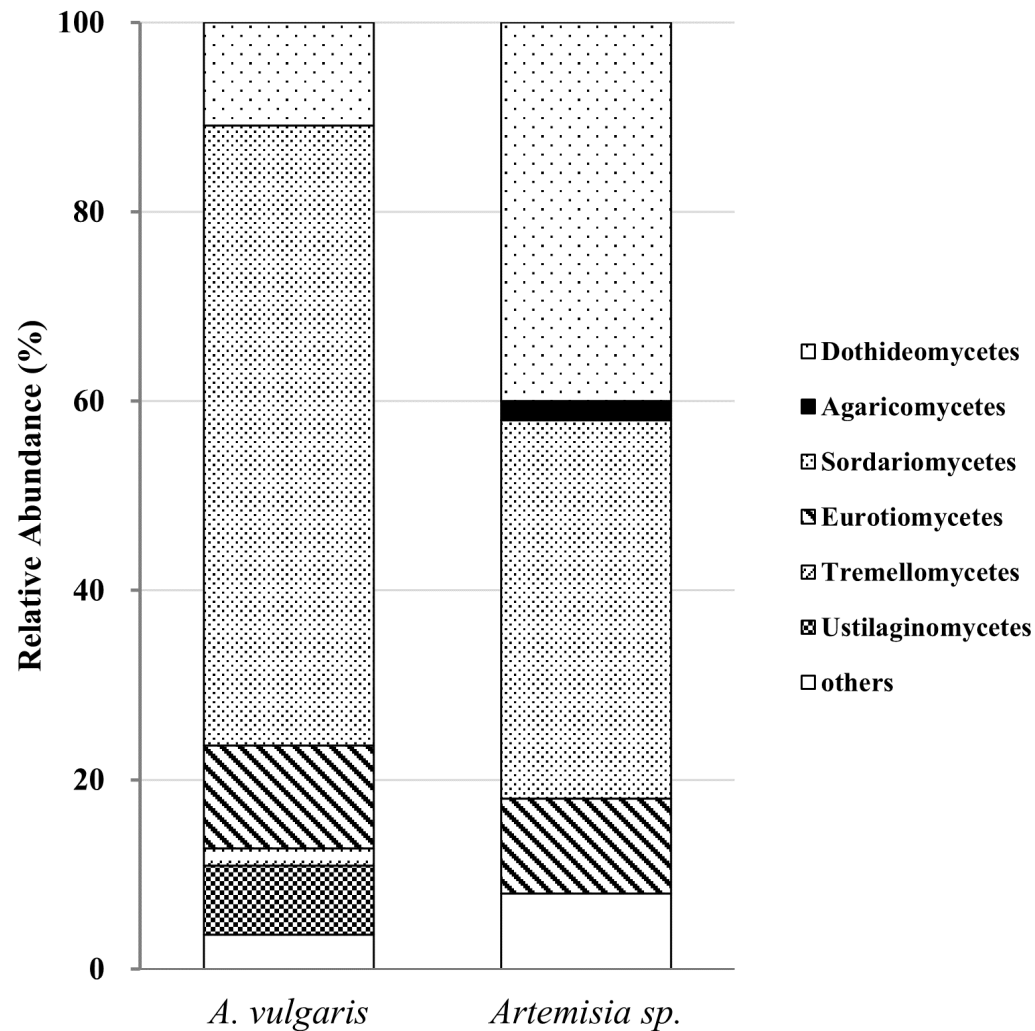

**Figure S1.** Class composition of endophytic fungi from isolated data of *A. vulgaris* [14] and *Artemisia sp.* [13]

[14] *J. Nat. Med.* **2023**, doi:10.1007/S11418-023-01709-7.

[13] *J. Fungi* **2018**, 4, 53. <https://doi.org/10.3390/jof4020053>
